# Supplementary material for: Discrepancies between general and central obesity in arterial stiffness: observational studies and Mendelian randomization study
Source: PubMed Central journal article supplement — BMC Med. 2024 Aug 7;22:325. doi: 10.1186/s12916-024-03546-1 (PMC11304581; doi:10.1186/s12916-024-03546-1), 2024-08-07
Supplement: 12916_2024_3546_MOESM2_ESM.pdf [file 12916_2024_3546_MOESM2_ESM.pdf]

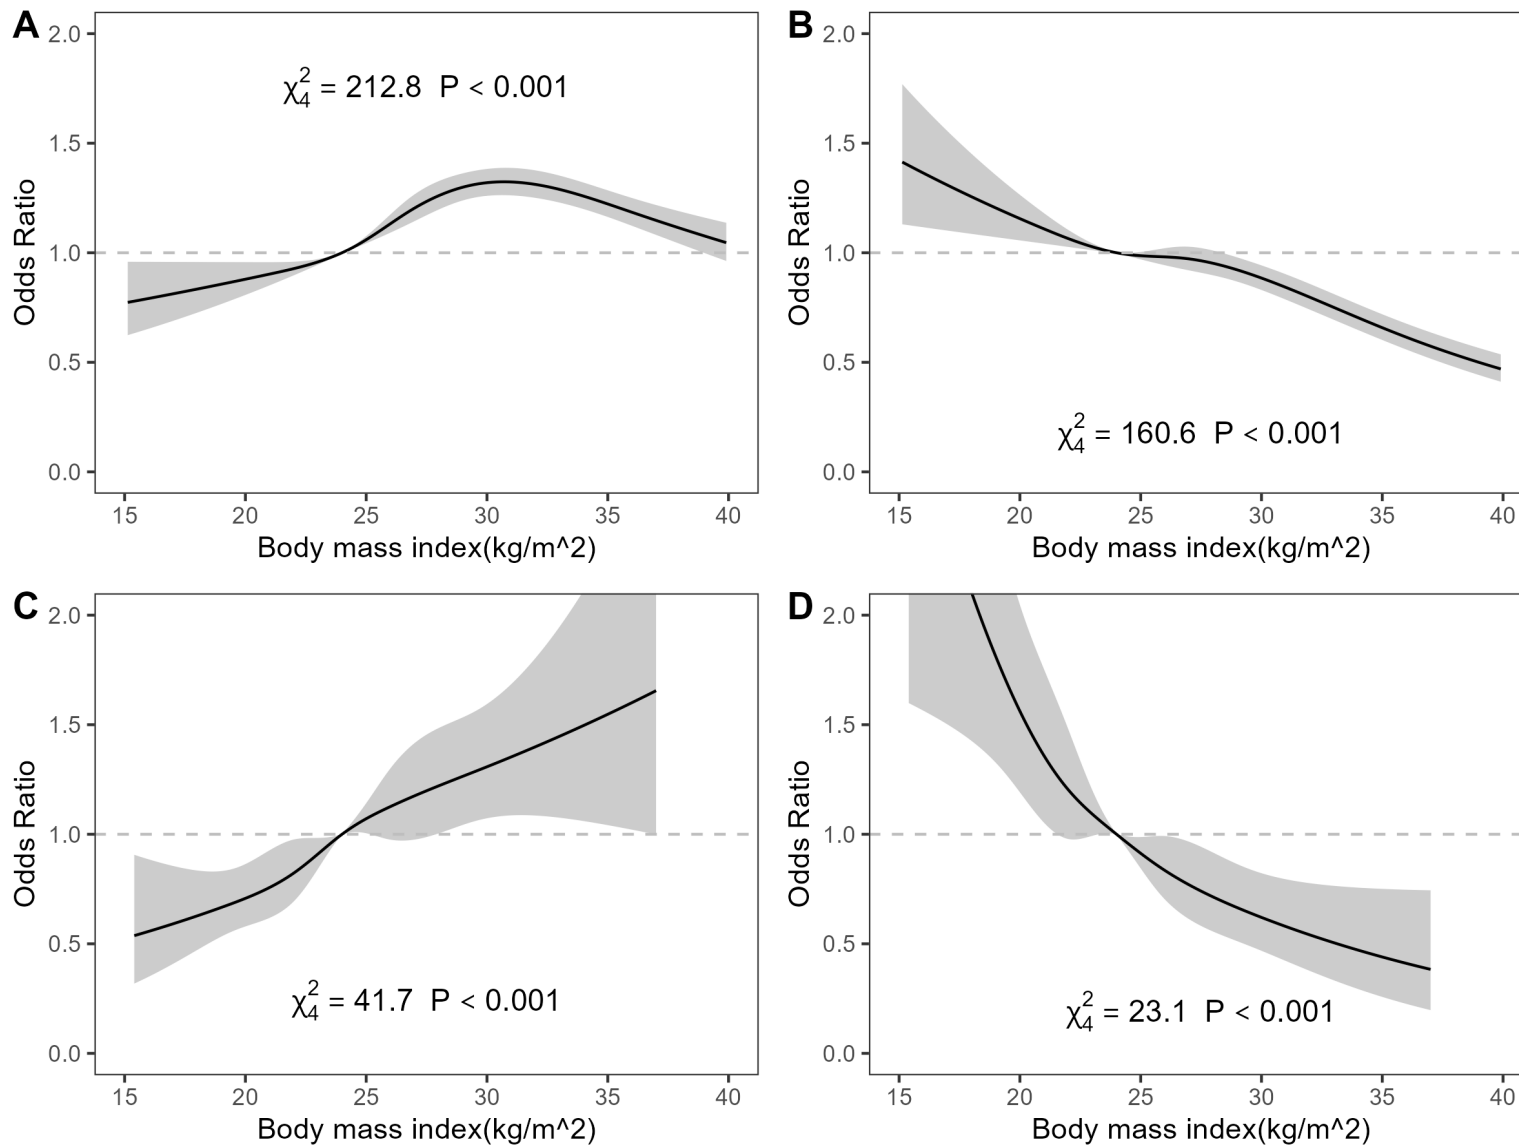

**Fig.S1. Association between body mass index and arterial stiffness via restricted cubic spline regression.**

A. Model 1 in UK Biobank project; B. Model 2 in UK Biobank project; C. Model 1 in Fuqing cohort project; D. Model 2 in Fuqing cohort project; \*Model 1 was adjusted for age, sex, education, smoking, alcohol intake frequency, physical activity, and LDL cholesterol; Model 2 was adjusted for age, sex, education, smoking, alcohol intake frequency, physical activity, LDL cholesterol, blood pressure, blood glucose, triglycerides, HDL cholesterol and WC/BMI.

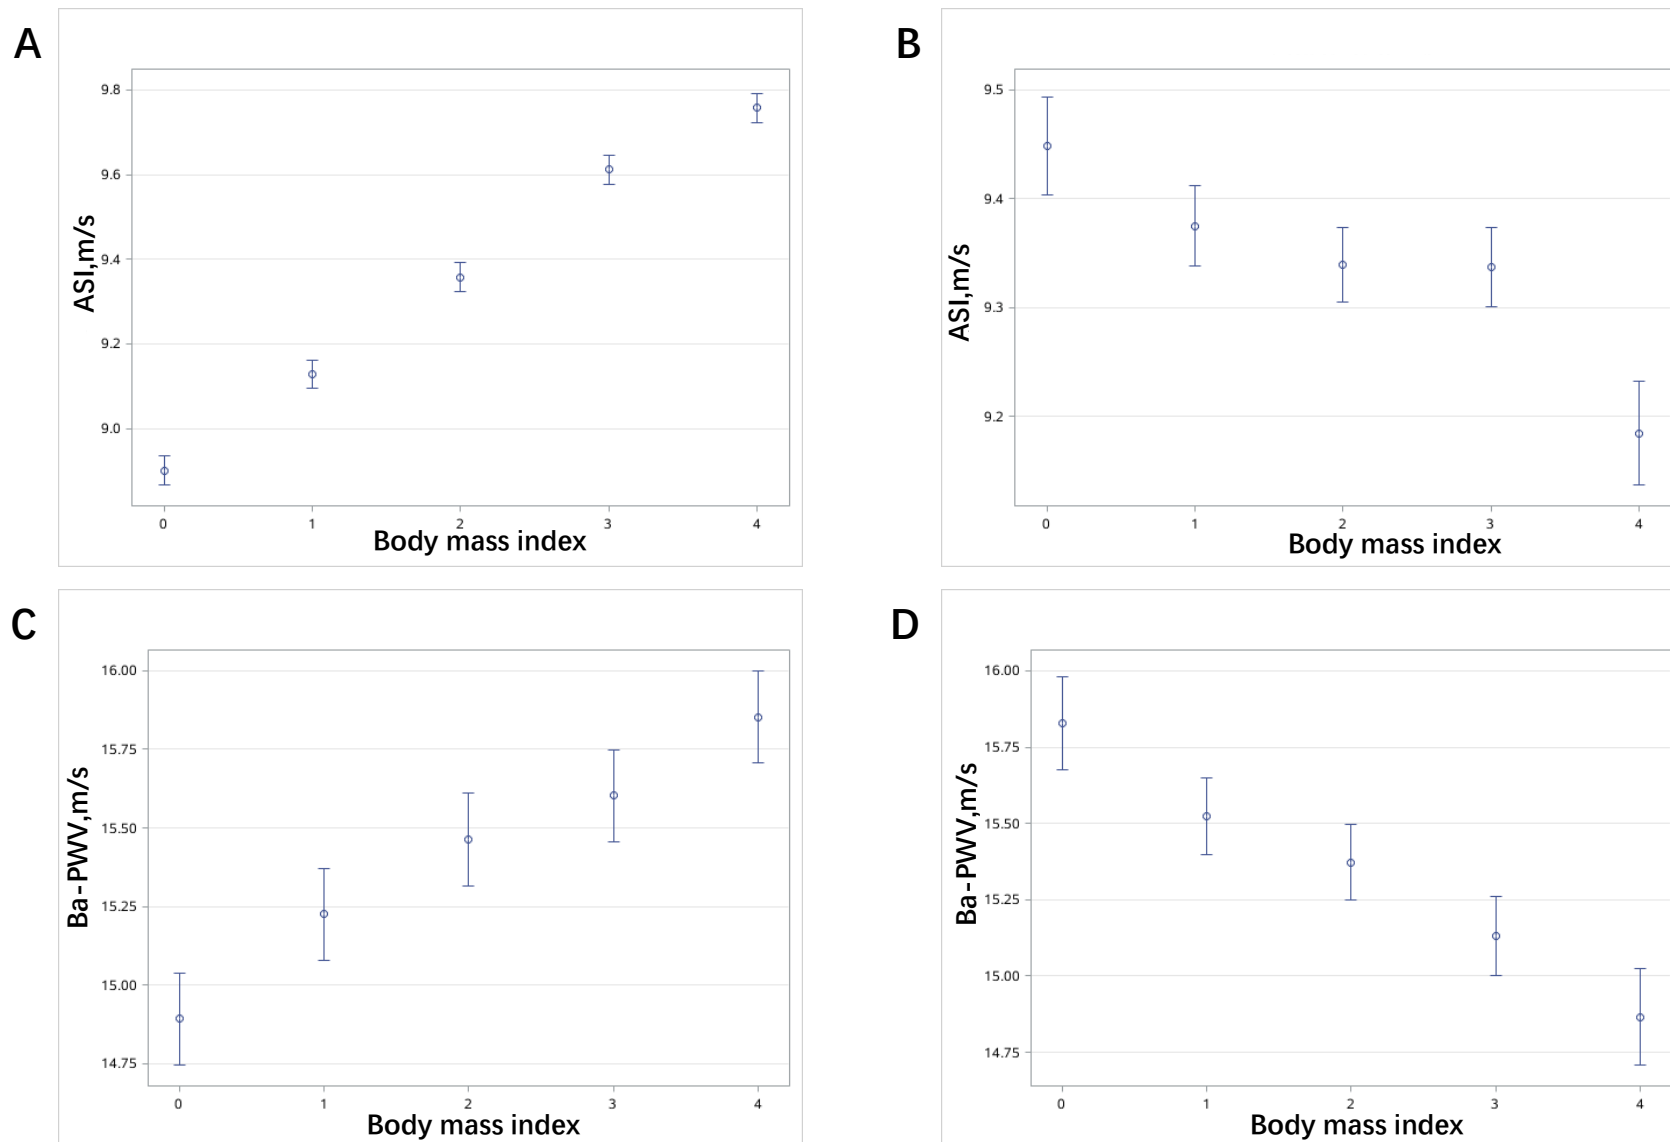

**Fig.S2. Body mass index quintile-specific estimated marginal means of brachial-ankle pulse wave velocity(Ba-PWV) or arterial stiffness index(ASI) via analysis of covariance.**

A. Model 1 in UK Biobank project; B. Model 2 in UK Biobank project; C. Model 1 in Fuqing cohort project; D. Model 2 in Fuqing cohort project; \*Model 1 was adjusted for age, sex, education, smoking, alcohol intake frequency, physical activity, and LDL cholesterol; Model 2 was adjusted for age, sex, education, smoking, alcohol intake frequency, physical activity, LDL cholesterol, blood pressure, blood glucose, triglycerides, HDL cholesterol and WC/BMI .

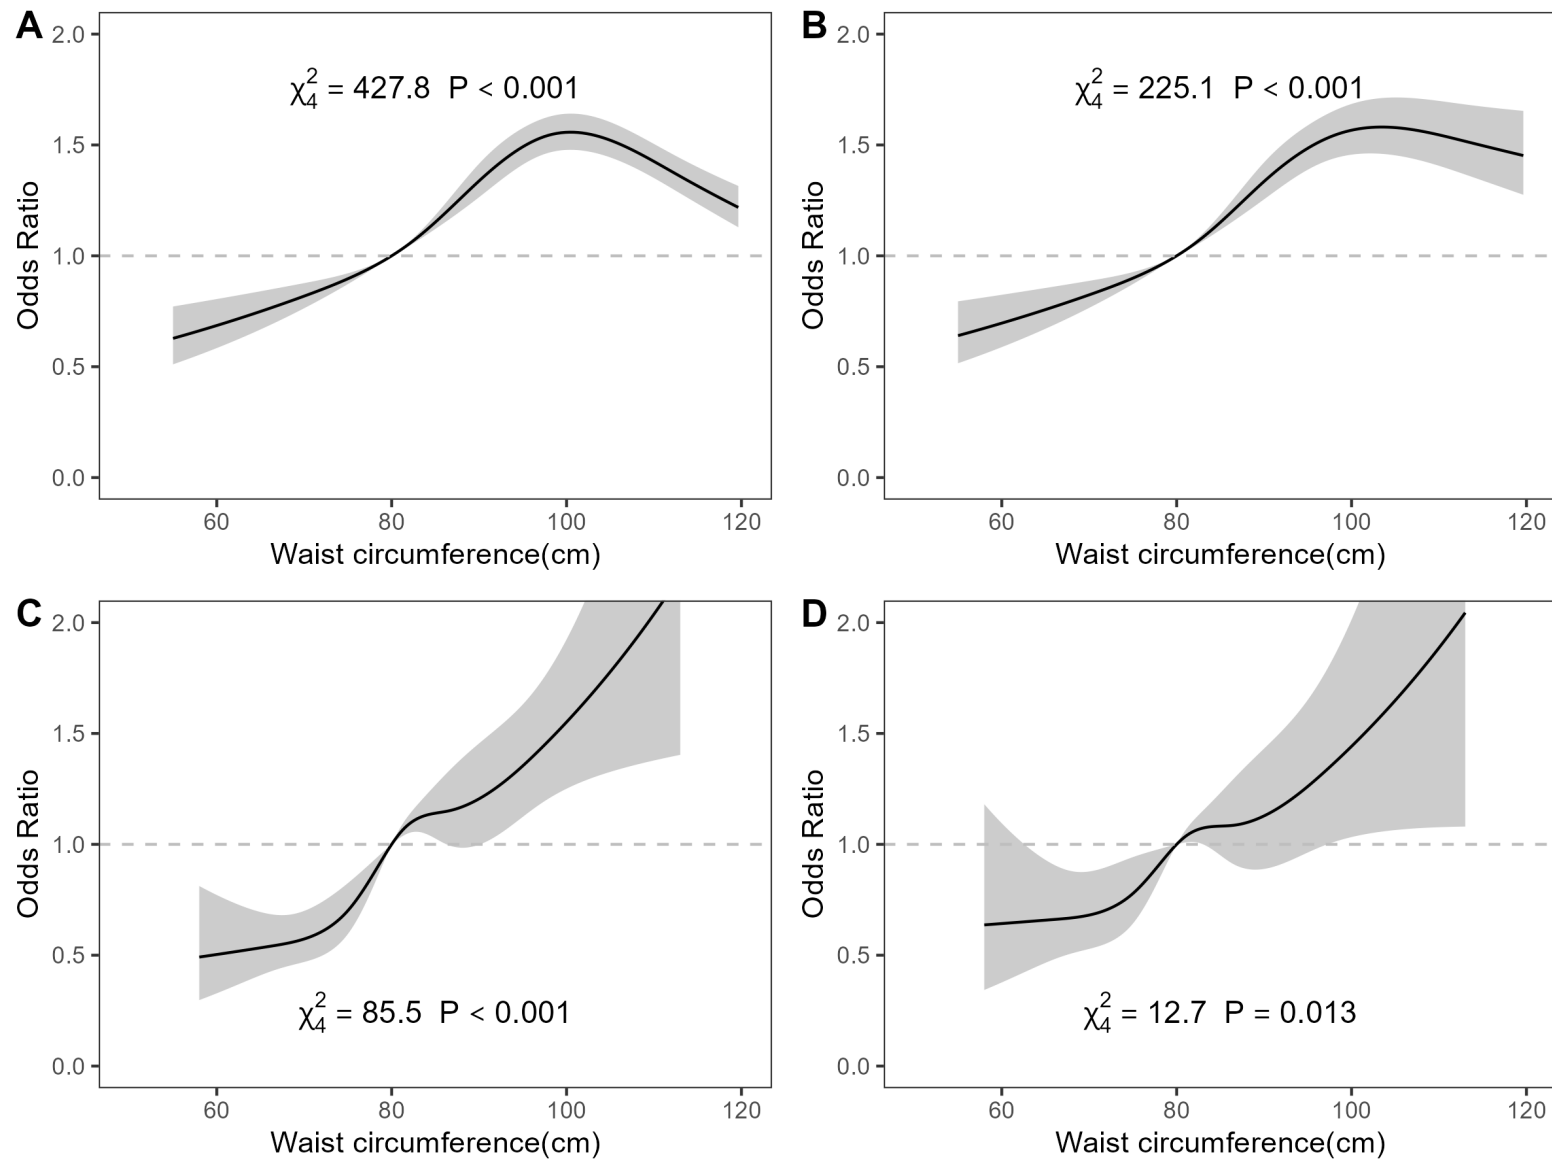

**Fig.S3. Association between waist circumference and arterial stiffness via restricted cubic spline regression.**

A. Model 1 in UK Biobank project; B. Model 2 in UK Biobank project; C. Model 1 in Fuqing cohort project; D. Model 2 in Fuqing cohort project; \*Model 1 was adjusted for age, sex, education, smoking, alcohol intake frequency, physical activity, and LDL cholesterol; Model 2 was adjusted for age, sex, education, smoking, alcohol intake frequency, physical activity, LDL cholesterol, blood pressure, blood glucose, triglycerides, HDL cholesterol and WC/BMI .

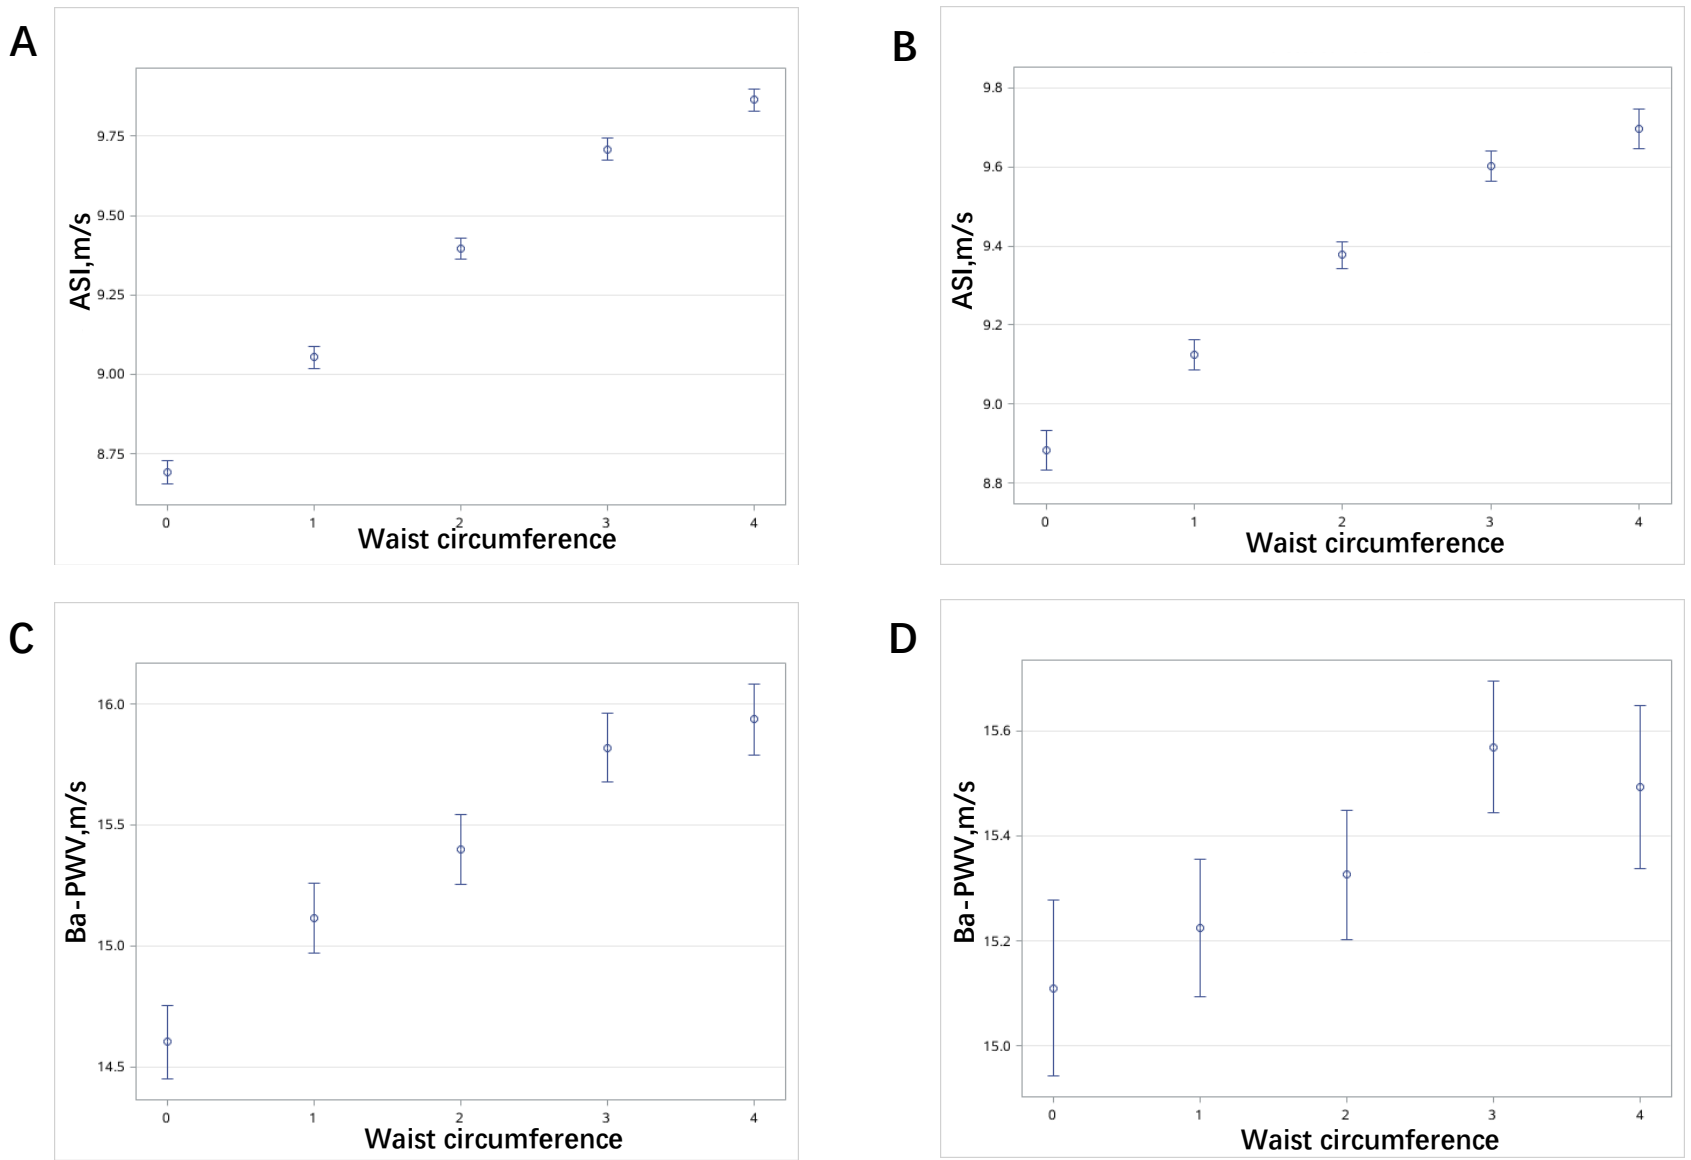

**Fig. S4. Waist circumference quintile-specific estimated marginal means of brachial-ankle pulse wave velocity(Ba-PWV) or arterial stiffness index(ASI) via analysis of covariance.**

A. Model 1 in UK Biobank project; B. Model 2 in UK Biobank project; C. Model 1 in Fuqing cohort project; D. Model 2 in Fuqing cohort project; \*Model 1 was adjusted for age, sex, education, smoking, alcohol intake frequency, physical activity, and LDL cholesterol; Model 2 was adjusted for age, sex, education, smoking, alcohol intake frequency, physical activity, LDL cholesterol, blood pressure, blood glucose, triglycerides, HDL cholesterol and WC/BMI .

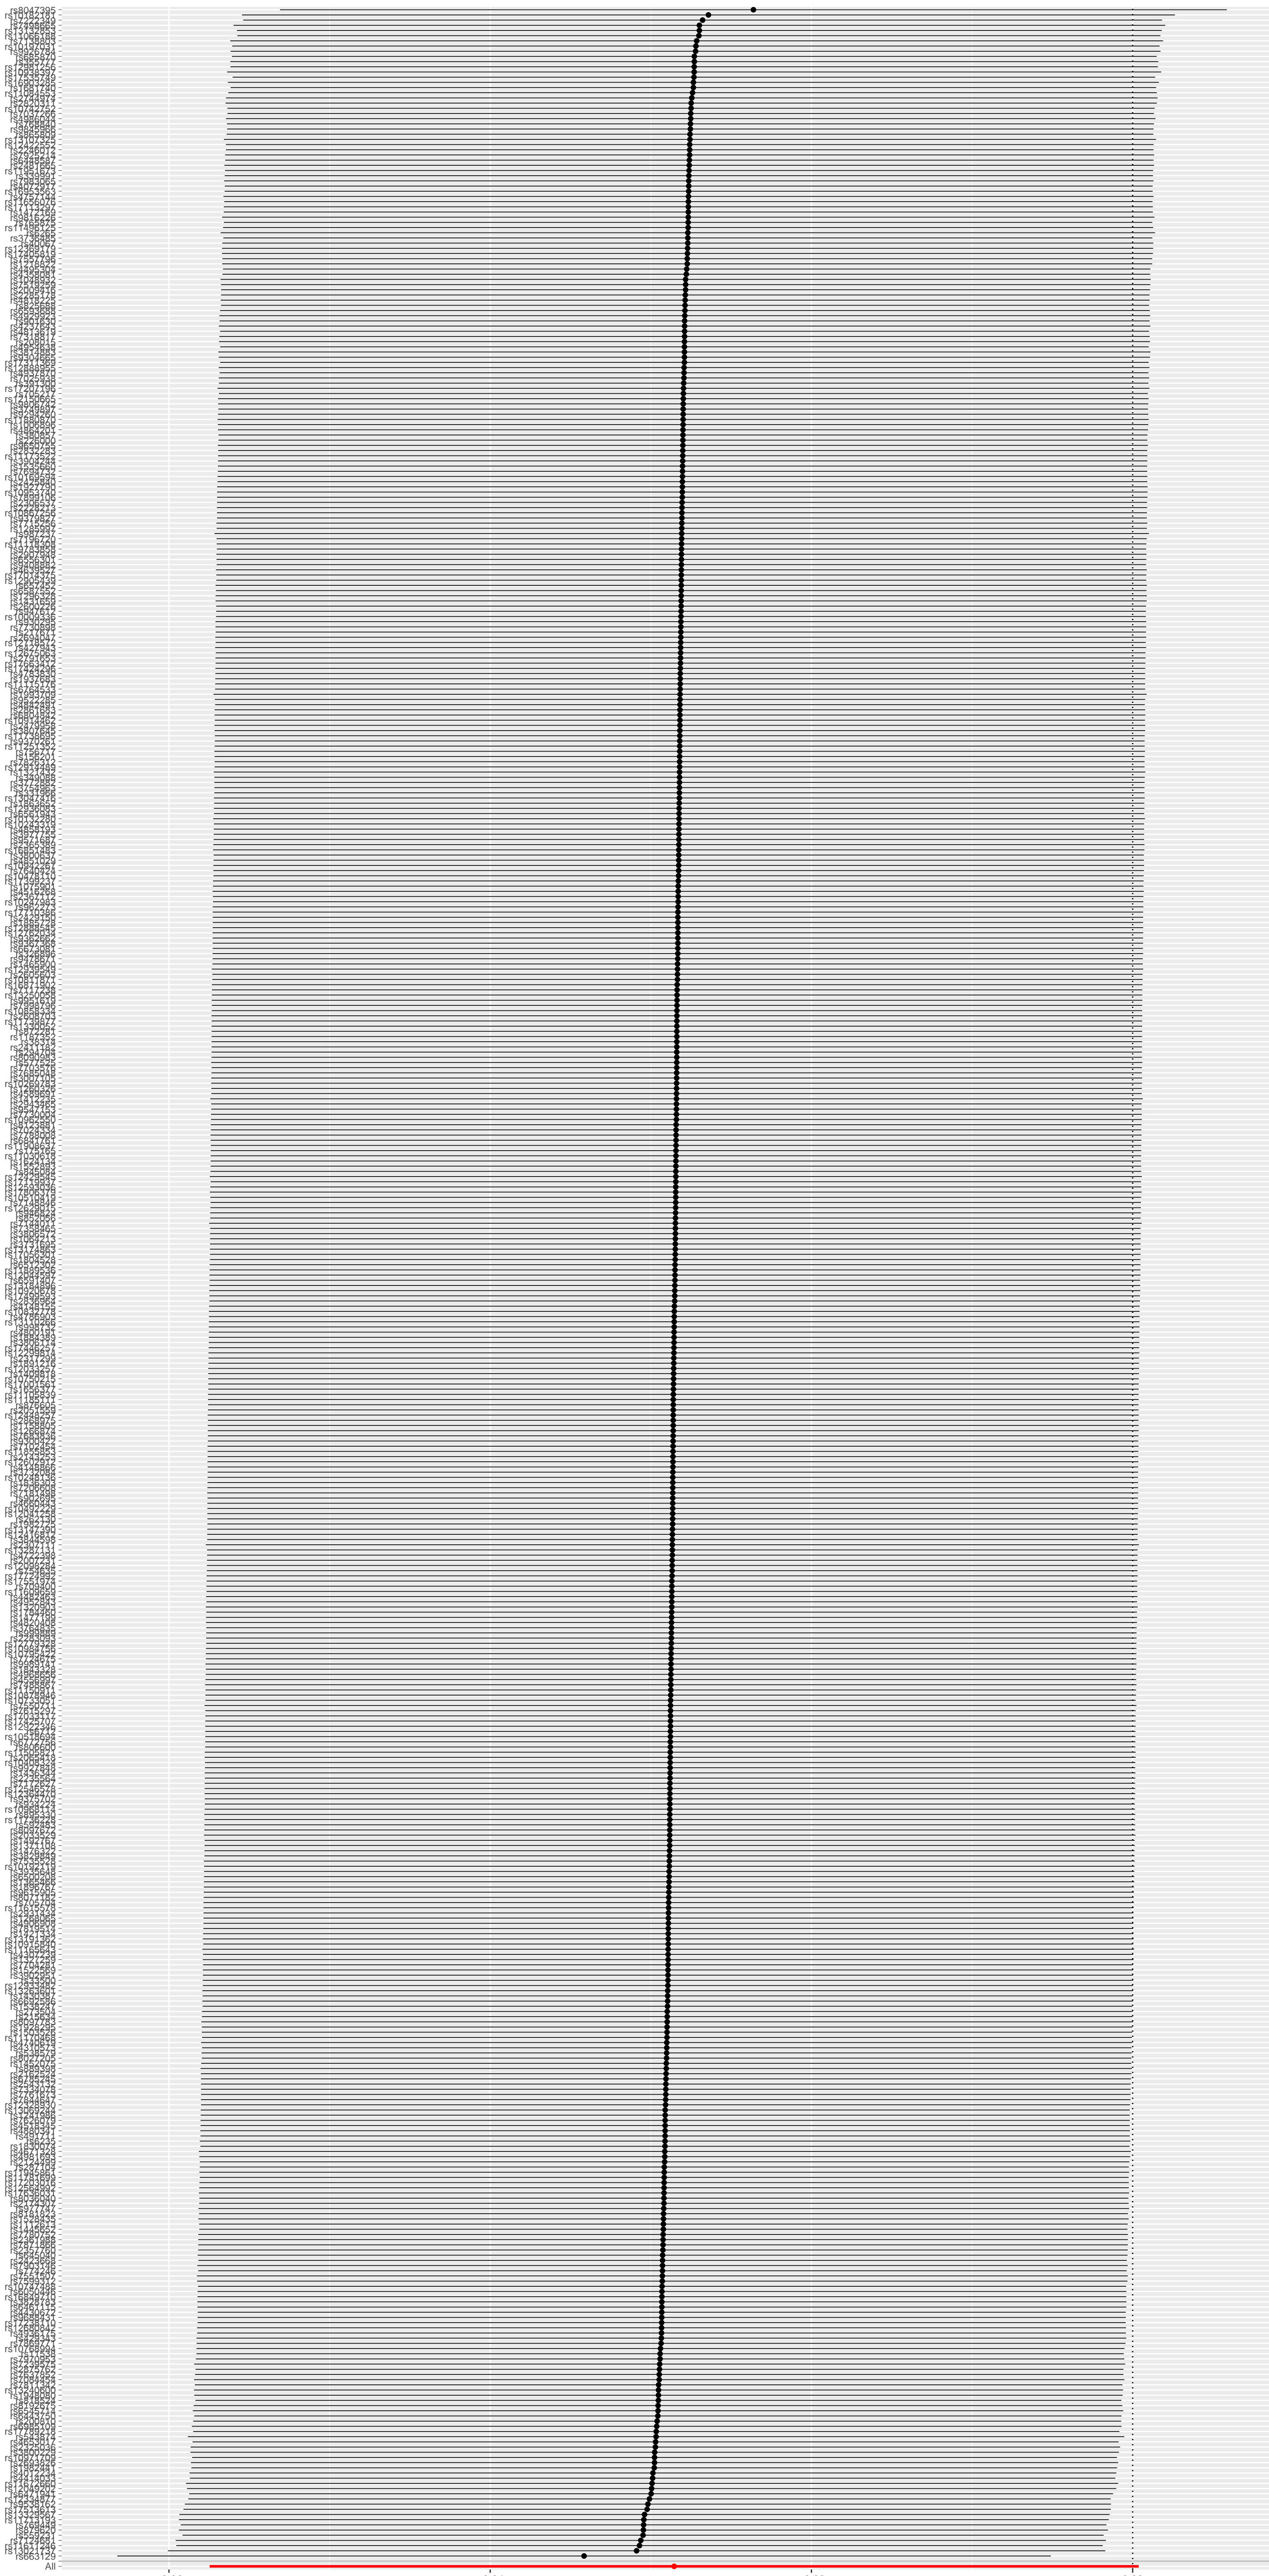

Fig.S5.MR leave-one-out sensitivity analysis for body mass index on arterial stiffness.

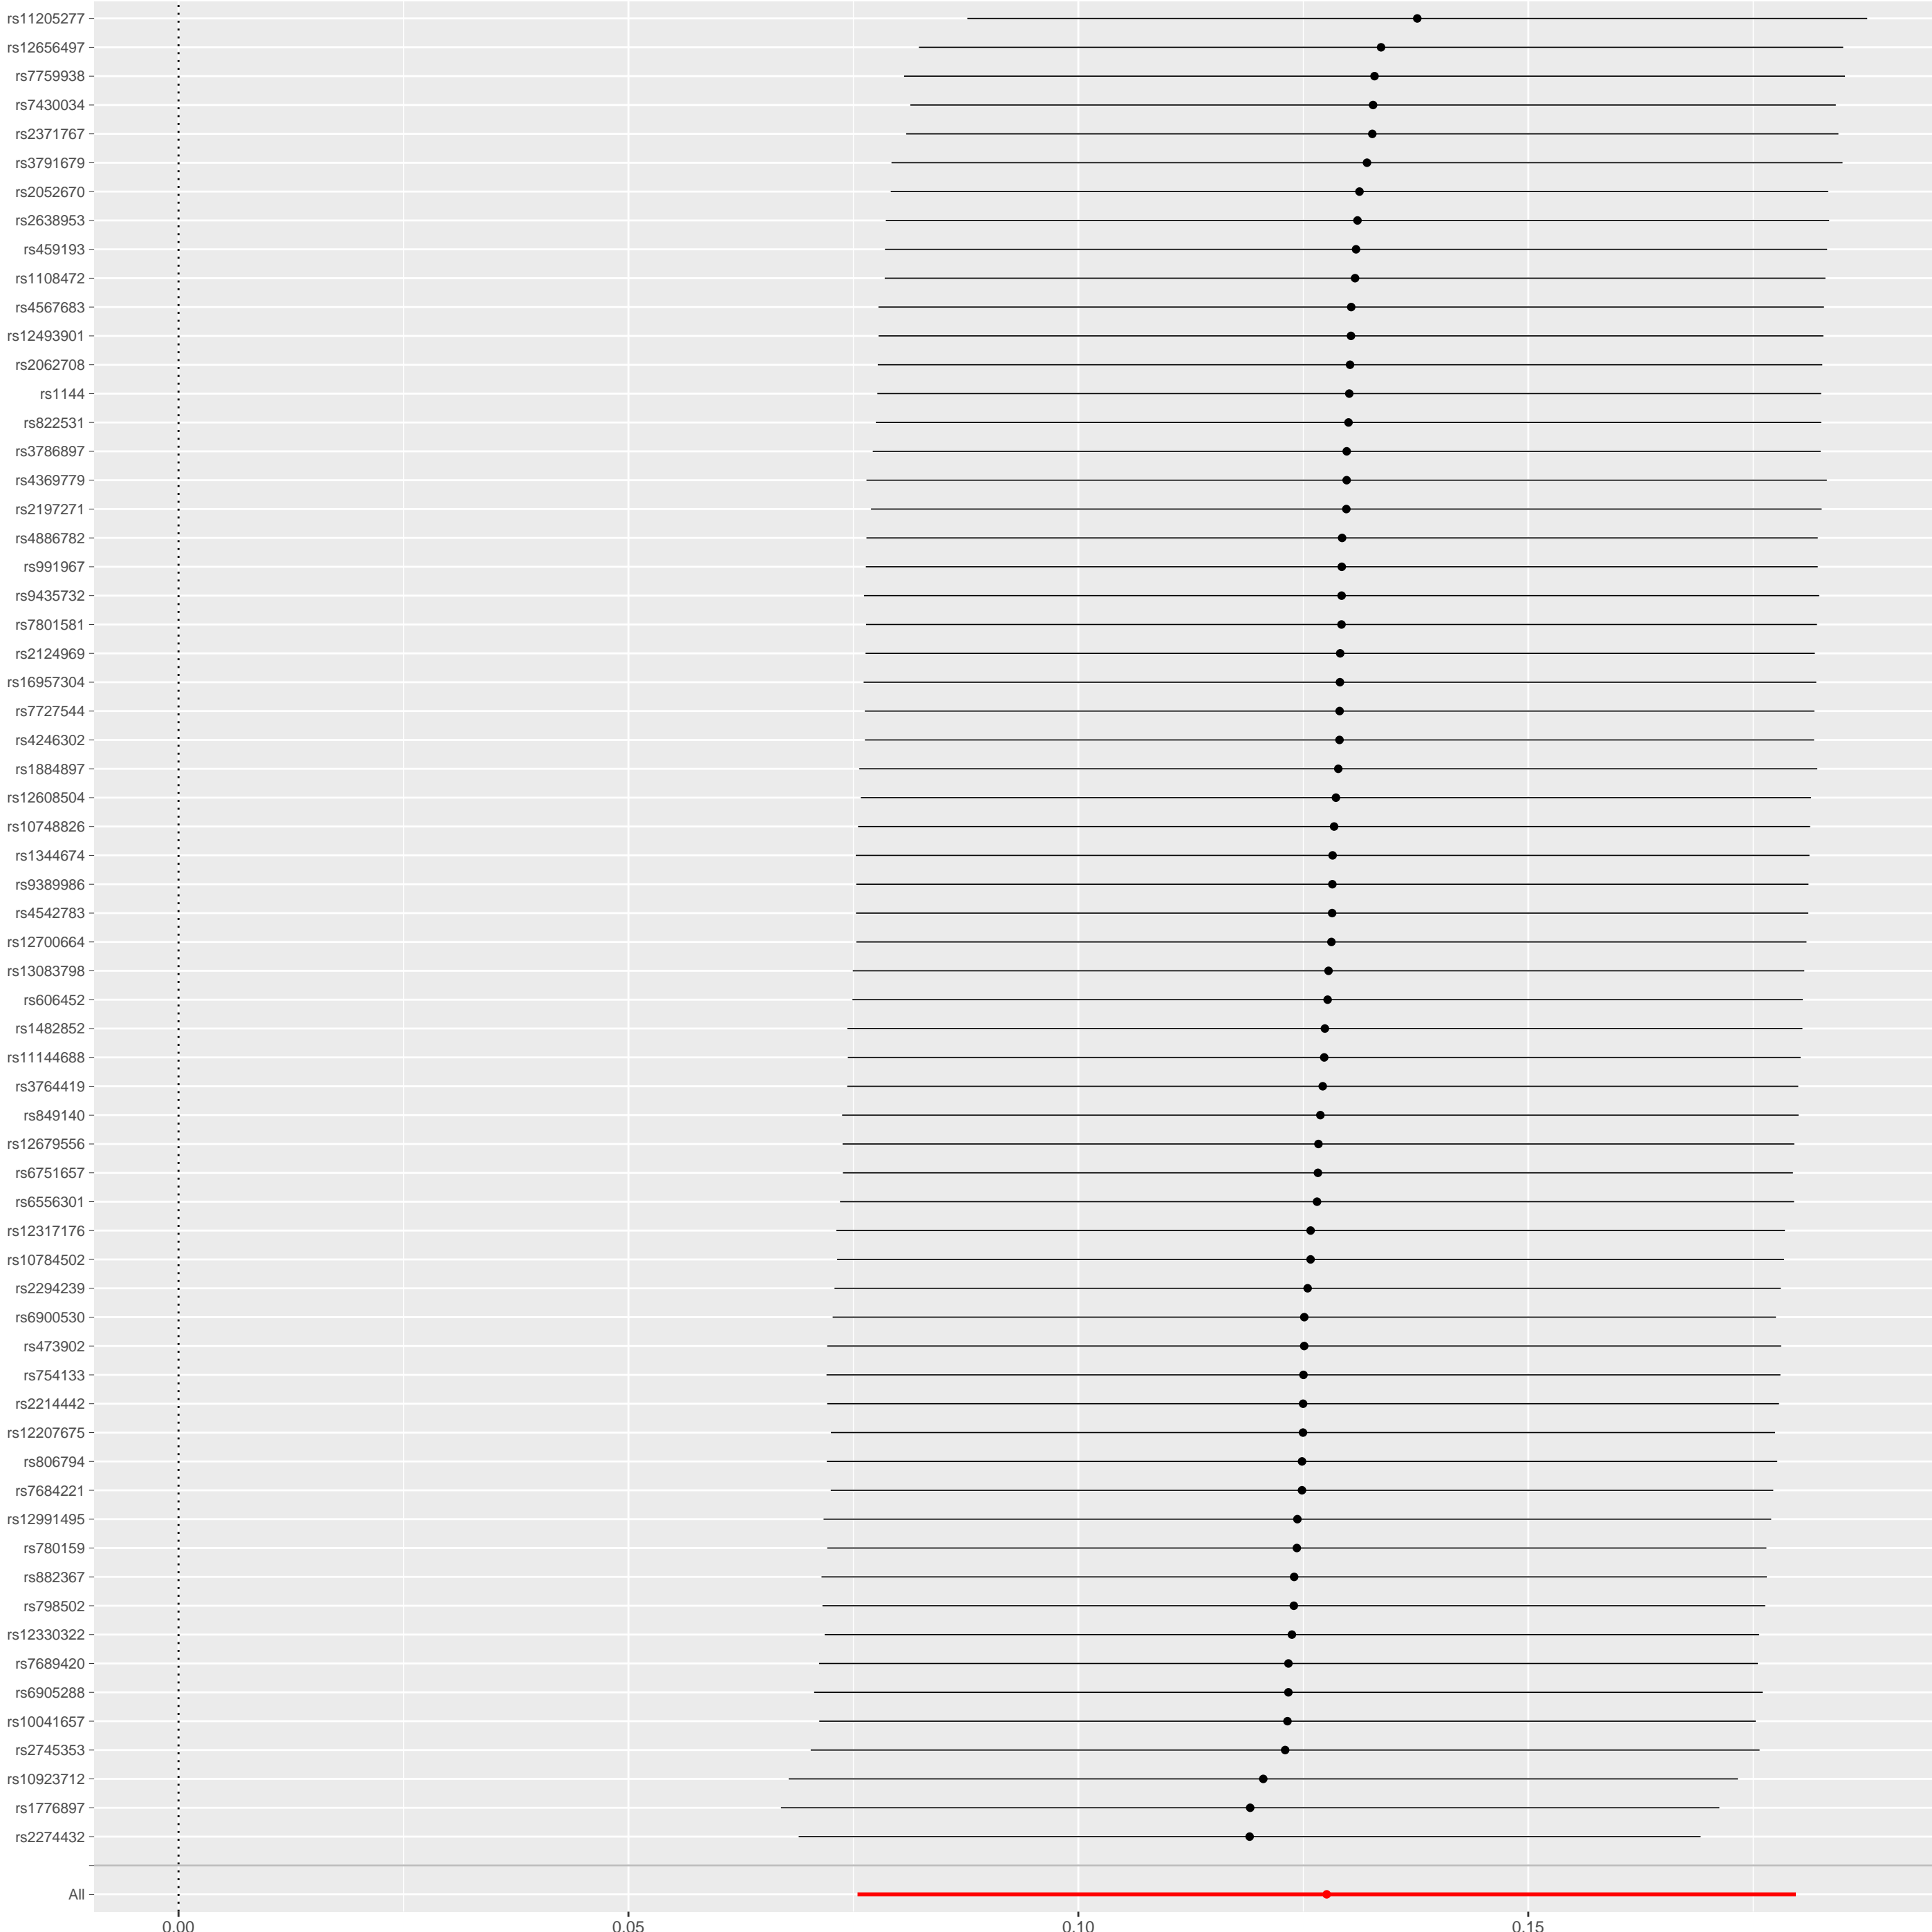

Fig.S6.MR leave-one-out sensitivity analysis for waist circumference on arterial stiffness.
